# Supplementary material
Source: publisher figshare collection journal article supplement (https://diabetesjournals.figshare.com/articles/dataset/_/23606034)
Supplement: Supplementary file 1 [file 1]

## Sheet: ST1
Supplementary table 1. STROBE MR checklist for Mendelian Randomization analysis
Item	Complete/location
1. Title and Abstract: "Mendelian randomization" is named in the title or in the abstract	"Mendelian randomization" is named in the title and abstract
Introduction
2. Background: Explain the scientific background and rationale for the reported study. Is causality between exposure and outcome plausible? Justify why MR is a helpful method to address the study question.	In the Introduction, we discuss why type 2 diabetes (T2D) is a plausible causal exposure for depressive symptoms and vice versa. In the first paragraph of Introduction section, we discuss why Mendelian randomization is useful in testing causality between depressive symptoms and type 2 diabetes.
3. Objectives: State specific objectives clearly, including pre-specified causal hypotheses (if any).	In the second paragraph of Introduction, we describe the causal hypotheses of our study.
Methods
4. Study design and data sources: Present key elements of study design early in the paper. Consider including a table listing sources of data for all phases of the study. For each data source contributing to the analysis, describe the following:	Available information about the GWAS studies is provided in the "Mendelian Randomization" section of the “Research design and Methods” section. Further information is given in the original GWAS publications referenced.
a) Describe the study design and the underlying population from which it was drawn. Describe also the setting, locations, and relevant dates, including periods of recruitment, exposure, follow-up, and data collection, if available.
b) Give the eligibility criteria, and the sources and methods of selection of participants.
c) Explain how the analyzed sample size was arrived at.
d) Describe measurement, quality and selection of genetic variants.
e) For each exposure, outcome and other relevant variables, describe methods of assessment and, in the case of diseases, the diagnostic criteria used.
f) Provide details of ethics committee approval and participant informed consent, if relevant.
5. Assumptions: Explicitly state assumptions for the main analysis (e.g. relevance, exclusion, independence, homogeneity) as well assumptions for any additional or sensitivity analysis.	Stated in the "Mendelian Randomization" section of the “Research design and Methods” section for both the main and the sensitivity analyses.
6. Statistical methods main analysis	a) we used diagnosis of T2D and depression as binary phenotypes
Describe statistical methods and statistics used.	b) described in the "Mendelian Randomization" section of the “Research design and Methods” section
a) Describe how quantitative variables were handled in the analyses (i.e., scale, units, model).	c) age, sex and principal components were used as covariates
b) Describe the process for identifying genetic variants and weights to be included in the	d) We stated that independent SNPs were used and described the proxy selection in the "Mendelian Randomization" section of the “Research design and Methods” section
analyses (i.e., independence and model). Consider a flow diagram.	e) N/A
c) Describe the MR estimator, e.g. two-stage least squares, Wald ratio, and related statistics.
Detail the included covariates and, in case of two-sample MR, whether the same covariate set was used for adjustment in the two samples.
d) Explain how missing data were addressed.
e) If applicable, say how multiple testing was dealt with.
Assessment of assumptions: Describe any methods used to assess the assumptions or justify their validity.	Our test for instrument heterogeneity and horizontal pleiotropy are described in the "Mendelian Randomization" section of the “Research design and Methods” section.
8. Sensitivity analyses: Describe any sensitivity analyses or additional analyses performed.	We applied the weighted median (WM), MR-Egger regression, the simple mode and the weighted mode methods as sensitivity analysis as described in the "Mendelian Randomization" section of the “Research design and Methods” section.
9. Software and pre-registration	a) All statistical software used are described in the "Mendelian Randomization" section of the “Research design and Methods” section
a) Name statistical software and package(s), including version and settings used.	b) The study protocol was not pre-registered.
b) State whether the study protocol and details were pre-registered (as well as when and where).
Results
10. Descriptive data	a) Information is given in the "Mendelian Randomization" section of the “Research design and Methods” section.
a) Report the numbers of individuals at each stage of included studies and reasons for exclusion. Consider use of a flow-diagram.	b) We give the summary statistics for our instruments in "Mendelian Randomization" section of the “Research design and Methods” section.
b) Report summary statistics for phenotypic exposure(s), outcome(s) and other relevant variables (e.g. means, standard deviations, proportions).	c) Provided in the Supplementary figure 1
c) If the data sources include meta-analyses of previous studies, provide the number of studies, their reported ancestry, if available, and assessments of heterogeneity across these studies. Consider using a supplementary table for each data source.	d) We stated that samples are non-overlapping in the "Mendelian Randomization" section of the “Research design and Methods” section
d) For two-sample Mendelian randomization:
i. Provide information on the similarity of the genetic variant-exposure associations between the exposure and outcome samples.
ii. Provide information on extent of sample overlap between the exposure and outcome data sources.
11. Main results	We describe the causal estimates in the "Mendelian Randomization" section of the “Results” section, 95% confidence intervals are provided as measures of uncertainty. Also two scatterplots included in the Supplementary Figure 3.
a) Report the associations between genetic variant and exposure, and between genetic variant and outcome, preferably on an interpretable scale (e.g. comparing 25th and 75th percentile of allele count or genetic risk score, if individual-level data available).
b) Report causal effect estimate between exposure and outcome, and the measures of uncertainty from the MR analysis. Use an intuitive scale, such as odds ratio, or relative
risk, per standard deviation difference.
c) If relevant, consider translating estimates of relative risk into absolute risk for a meaningful time-period.
d) Consider any plots to visualize results (e.g. forest plot, scatterplot of associations between genetic variants and outcome versus between genetic variants and exposure).
12. Assessment of assumptions	Our test for instrument heterogeneity and horizontal pleiotropy are described in the "Mendelian Randomization" section of the “Research design and Methods” and “Results” section.
a) Assess the validity of the assumptions.
b) Report any additional statistics (e.g., assessments of heterogeneity, such as I2, Q statistic).
13. Sensitivity and additional analyses	We report the results of all additional and sensitivity analyses together with the main results in the "Mendelian Randomization" section of the “Results” section.
a) Use sensitivity analyses to assess the robustness of the main results to violations of the assumptions.	c) We assessed causality in both directions.
b) Report results from other sensitivity analyses (e.g., replication study with different dataset, analyses of subgroups, validation of instrument(s), simulations, etc.).	d) Comparison with the epidemiological studies was reported in the Abstract, Introduction and Conclusion.
c) Report any assessment of direction of causality (e.g., bidirectional MR).	e) Results of leave-one-out analysis presented on the Supplementary Figure 4.
d) When relevant, report and compare with estimates from non-MR analyses.
e) Consider any additional plots to visualize results (e.g., leave-one-out analyses).
Discussion
14. Key results	We discuss key results in the Conclusion section. “We conclude that the shared loci between depressive symptoms and type 2 diabetes support a role of insulin function and signaling and, immune system pathways in their pathophysiology and co-morbidity, boosting our understanding of the pathogenesis of the two diseases. The causal effect of depression leading to the development of type 2 diabetes i…
15. Limitations	Described in the Conclusion section.
Discuss limitations of the study, taking into account the validity of the MR assumptions, other sources of potential bias, and imprecision. Discuss both direction and magnitude of any potential bias, and any efforts to address them.
16. Interpretations	We interpret the results in the abstract “Our findings support a causal effect from depression to type 2 diabetes, provide evidence for shared genetic background, and point to pathways related to insulin signaling and immune response in this co-morbidity” as well as in the Conclusion.
a) Give a cautious overall interpretation of results considering objectives and limitations.
Compare with results from other relevant studies.
b) Discuss underlying biological mechanisms that could be modelled by using the genetic
variants to assess the relationship between the exposure and the outcome.
c) Discuss whether the results have clinical or policy relevance, and whether interventions
could have the same size effect.
17. Generalizability:	In the abstract we concluded “The causal effect of depression leading to the development of type 2 diabetes is an important clinical management avenue for healthcare and prevention”.
18. Funding:	We have reported all sources of funding.
19. Data and data sharing:	We give access information to all data used in the study in the "Data availability" section and our Supplementary tables 1-3. Links to the statistical software used, including TwoSampleMR, LD score regression, are given in the “Genetic correlation analysis”, “MR analysis” sections of Methods.
20. Conflicts of Interest:	All authors have declared conflicts of interest (none reported).

## Sheet: ST2
Supplementary Table 2. UKBB study participants, including gender proportions, used in the present study
Phenotype	Cases	Controls	Prevalence	Total
	% (male, female)	% (male, female)	%	(N)
Type 2 diabetes	19344	463641	4.2	482985
	(64.3, 35.7)	(45.0, 55.0)
MDD	5262	86275	6.2	91537
	(32.6, 67.4)	(47.3, 52.7)
PHQ-9	153079	-	-	153079
	(43.5, 56.5)

## Sheet: ST3
Supplementary Table 3. Proportion of depression phenotype participants with a type 2 diabetes diagnosis in the UK Biobank. Chi-square test was done to test independence between groups
Depression phenotypes	Type 2 diabetes Cases (%)	Type 2 diabetes Controls (%)	Total	X2 statistic	X2 P-value
MDD Cases	57 (1.10)	5,283 (98.90)	5340	134.09	<2.2x10-16
MDD Controls	3,756 (4.38)	82,009 (94.62)	85767
PHQ-9	2,781 (2.70)	100,029 (97.30)	102810	22.41	2.78x10-07
(Sum score ≥ 10)
PHQ-9	1,116 (2.26)	48,253 (97.74)	49369
(Sum score <10)

## Sheet: ST4
Supplementary Table 4. The PHQ-9 questionnaire as provided in the UK Biobank.
UK Biobank Field	Field Description	Code
20514	Recent lack of interest or pleasure in doing things	0,1,2,3
20510	Recent feelings of depression	0,1,2,3
20517	Trouble falling or staying asleep or sleeping too much	0,1,2,3
20519	Recent feelings of tiredness or low energy	0,1,2,3
20511	Recent poor appetite or overeating	0,1,2,3
20507	Recent feelings of inadequacy	0,1,2,3
20508	Trouble concentrating on things	0,1,2,3
20518	Recent change in speed/amount of moving or speed	0,1,2,3
20513	Recent thoughts of suicide or self-harm	0,1,2,3
Code legend: 0 = Not at all, 1 = Several days, 2 = Half the days, 3 = Nearly every day

## Sheet: ST5
Supplementary Table 5. List of variables in the data used in PHQ-9 items imputation. Data included only individuals with less than three PHQ9 items responses missing.
Variables	Missing Items	Missingness rate (%)	Items present
Sex	0	0	153 079
Age	0	0	153 079
Array	0	0	153 079
Education qualification	355	0.23	152 724
Townsend Deprivation Index	191	0.12	152 888
BMI	326	0.21	152 753
PC1	0	0	153 079
PC2	0	0	153 079
PC3	0	0	153 079
PC4	0	0	153 079
PC5	0	0	153 079
PC6	0	0	153 079
PC7	0	0	153 079
PC8	0	0	153 079
phq9_1	306	0.2	152 773
phq9_2	426	0.28	152 653
phq9_3	238	0.16	152 841
phq9_4	244	0.16	152 835
phq9_5	146	0.095	152 933
phq9_6	658	0.43	152 421
phq9_7	143	0.093	152 936
phq9_8	210	0.14	152 869
phq9_9	1 118	0.73	151 961

## Sheet: ST6
Supplementary Table 6. Proportion of type 2 diabetes cases and controls by depression severity categories defined by the PHQ-9 sum scores.
Depression severity (PHQ-9 Sum scores)	Type 2 diabetes	Type 2 diabetes	Total
	Cases (%)	Controls (%)
None - minimal (0 - 4)	2,820 (2.34)	117,515 (97.66)	120335
Mild (5 - 9)	690 (3.03)	22,082 (96.97)	22772
Moderate (10 - 14)	251 (4.26)	5,640 (95.74)	5891
Moderately severe (15 - 19)	92 (4.33)	2,031 (95.67)	2123
Severe (20 - 27)	37 (4.32)	819 (95.68)	856
Total	3890	148087	151977
Only individuals with both PHQ-9 data and a type 2 diabetes diagnosis (N = 152,354) are included.

## Sheet: ST7
Supplementary Table 7. The number of genes tested per GTEx tissue model and the related significance threshold, followed by the number of significant (Bonferroni corrected) genes for Type 2 diabetes and PHQ-9 after MP-GWAS and finally, the number of common genes between type 2 diabetes and PHQ-9.
Tissue	Genes	Significance	No of significant	No of significant	Common
	tested	threshold	type 2 diabetes	PHQ9 genes	Significant genes
			genes
Adipose subcutaneous	8258	6.050x-06	27	4	3
Adrenal gland	4602	1.086x-05	4	0	0
Amygdala	2358	2.120x-05	4	2	1
Anterior cingulate cortex	3302	1.514x-05	1	0	0
Frontal cortex	3598	1.390x-05	5	1	1
Hippocampus	2816	1.776x-05	5	0	0
Hypothalamus	2832	1.766x-05	2	2	1
Liver	3345	1.495x-05	7	0	0
Pancreas	5334	9.370x-06	11	0	0
Putamen basal ganglia	3174	1.575x-05	2	0	0
Skeletal muscle	7514	6.560x-06	11	3	2
Substantia nigra	2041	2.450x-05	1	1	1
Whole blood	6285	7.960x-06	10	2	2
Significance threshold = Bonferroni corrected P-value based on the number of genes tested per tissue (P=0.05/n where n = number of genes tested)

## Sheet: ST8
Supplementary Table 8. Mendelian Randomization results with depression as the exposure and type 2 diabetes as the outcome variable.
Method	Outcome	Exposure	NSNPs	OR (95%CI)	P
IVW	Type 2 Diabetes	Depression	95	1.18 (1.061-1.32)	0.0024
Weighted median	Type 2 Diabetes	Depression	95	1.11 (1.00-1.23)	0.043
MR Egger	Type 2 Diabetes	Depression	95	0.95 (0.50-1.81)	0.88
Simple mode	Type 2 Diabetes	Depression	95	0.89 (0.60-1.32)	0.56
Weighted mode	Type 2 Diabetes	Depression	95	1.29 (0.89-1.87)	0.18
Legend: IVW = Inverse variance weighted, Nsnps = Number of SNPs (instrument variables) used, OR(95%CI) = odds ratio and lower and upper 95% confidence intervals (CI)

## Sheet: ST9
Supplementary Table 9. Mendelian Randomization results with type 2 diabetes as the exposure and depression as the outcome variable
Method	Outcome	Exposure	NSNPs	OR(95%CI)	P
IVW	Depression	Type 2 Diabetes	344	0.999 (0.986-1.011)	0.84
Weighted median	Depression	Type 2 Diabetes	344	0.995 (0.979-1.011)	0.52
MR Egger	Depression	Type 2 Diabetes	344	0.984 (0.959-1.009)	0.204
Simple mode	Depression	Type 2 Diabetes	344	1.004 (0.964-1.045)	0.85
Weighted mode	Depression	Type 2 Diabetes	344	0.988 (0.967-1.0102)	0.29
Legend: IVW = Inverse variance weighted, Nsnps = Number of SNPs (instrument variables) used, OR(95%CI) = odds ratio and lower and upper 95% confidence intervals (CI)

## Sheet: ST10
Supplementary Table 10. The number of genome-wide significant independent signals for each studied phenotype, identified with each analytical approach, implemented in either BOLT-LMM or MTAG in UKBB
Software tool	Type of GWAS	Type 2 diabetes	MDD	PHQ-9
BOLT-LMM	Single phenotype	92	0	3
MTAG (Type 2 diabetes + MDD)	Multi-phenotype	68	0	-*
MTAG (Type 2 diabetes + PHQ-9)	Multi-Phenotype	53	-*	8
* “-“The phenotype is not analyzed in this model

[truncated: 7 more sheets: ST11, ST12, ST13, ST14, ST15, ST16, ST17]
